# Supplementary material for: Gestational Diabetes Mellitus (GDM) Risk for Declared Family History of Diabetes, in Combination with BMI Categories
Source: MDPI journal article supplement (doi:10.3390/ijerph18136936), 2021-06-28
Supplement: s1 [file s1]

**Table S1.** Odds ratios of gestational diabetes mellitus (GDM -1, -2) for basic risk factors (set of data).

| Risk factors                              | Cases/<br>Controls | OR (95% CI), p               | AOR-a (95% CI), p             |
|-------------------------------------------|--------------------|------------------------------|-------------------------------|
| <b>GDM-1 risk</b>                         |                    |                              |                               |
| Pre-pregnancy BMI, kg / m <sup>2</sup> ): |                    |                              |                               |
| Obesity (≥ 30)                            | 25/66              | 2.75 (1.63–4.63); <0.001     | 2.27 (1.32–3.91); 0.003       |
| Overweight (24.5–29.9)                    | 21/147             | 1.04 (0.62–1.74); 0.893      | 0.95 (0.56–1.61); 0.845       |
| Underweight (<18.5)                       | 8/38               | 1.53 (0.69–3.41); 0.301      | 1.74 (0.76–3.96); 0.187       |
| Normal BMI (18.5–24.9)                    | 71/515             | 1                            | 1                             |
| Smoking in the 1 <sup>st</sup> tr.        | 10/47              | 1.33 (0.65–2.71); 0.431      | 1.34 (0.64–2.81); 0.434       |
| Smoking before pregn.                     | 21/145             | 0.86 (0.52–1.43); 0.571      | 0.63 (0.32–1.23); 0.175       |
| Never smoked                              | 104/621            | 1                            | 1                             |
| GWG above the range                       | 33/298             | 0.83 (0.51–1.35); 0.454      | 0.68 (0.41–1.13); 0.137       |
| GWG in the range                          | 39/292             | 1                            | 1                             |
| GWG below the range                       | 53/176             | 2.25 (1.43–3.55); <0.001     | 2.39 (1.5–3.82); <0.001       |
| Maternal age, years:                      |                    |                              |                               |
| ≥ 40                                      | 14/59              | 2.15 (0.96–4.8); 0.061       | 2.31 (0.99–5.34); 0.052       |
| 25–29                                     | 14/127             | 1                            | 1                             |
| 18–24                                     | 2/38               | 0.48 (0.1–2.19); 0.342       | 0.43 (0.09–2); 0.283          |
| Prior GDM                                 | 3/3                | 6.25 (1.25–31.34); 0.026     | 9.88 (1.87–52.29); 0.007      |
| No prior GDM                              | 122/763            | 1                            | 1                             |
| Multiparity                               | 66/448             | 0.79 (0.54–1.16); 0.234      | 0.57 (0.38–0.86); 0.007       |
| Primiparity                               | 59/318             | 1                            | 1                             |
| PE                                        | 1/21               | 0.3 (0.04–2.23); 0.238       | 0.21 (0.03–1.64); 0.138       |
| No PIH                                    | 105/654            | 1                            | 1                             |
| <b>GDM-2 risk</b>                         |                    |                              |                               |
| Pre-pregnancy BMI (kg / m <sup>2</sup> ): |                    |                              |                               |
| Obesity (≥ 30)                            | 7/66               | 6.83 (2.4–19.44); <0.001     | 6.91 (2.38–20.05); <0.001     |
| Overweight (24.5–29.9)                    | 5/147              | 2.19 (0.17–6.79); 0.175      | 2.01 (0.64–6.38); 0.234       |
| Underweight (<18.8)                       | 1/38               | 1.69 (0.21–13.9); 0.624      | 2.33 (0.28–19.67); 0.436      |
| Normal BMI (18.5–24.9)                    | 8/515              | 1                            | 1                             |
| Smoking in the 1 <sup>st</sup> tr.        | 0/47               | –                            | –                             |
| Smoking before pregn.                     | 2/145              | 0.45 (0.1–1.96); 0.288       | 0.61 (0.14–2.76); 0.525       |
| Never smoked                              | 19/621             | 1                            | 1                             |
| GWG above the range                       | 5/298              | 0.7 (0.22–2.23); 0.546       | 0.51 (0.16–1.67); 0.267       |
| GWG in the range                          | 7/292              | 1                            | 1                             |
| GWG below the range                       | 9/176              | 2.13 (0.78–5.83); 0.140      | 2.99 (1.03–8.74); 0.045       |
| Maternal age, years:                      |                    |                              |                               |
| ≥ 40                                      | 3/59               | 2.15 (0.42–10.98); 0.357     | 1.2 (0.22–6.75); 0.832        |
| 25–29                                     | 3/127              | 1                            | 1                             |
| 18–24                                     | 0/38               | –                            | –                             |
| Prior GDM                                 | 5/3                | 79.48 (17.48–361.43); <0.001 | 138.71 (23.67–812.84); <0.001 |
| No prior GDM                              | 16/763             | 1                            | 1                             |
| Multiparity                               | 16/448             | 2.27 (0.82–6.26); 0.113      | 1.91 (0.66–5.53); 0.230       |
| Primiparity                               | 5/318              | 1                            | 1                             |
| PE                                        | 2/21               | 3.89 (0.84–18.03); 0.082     | 2.21 (0.4–12.08); 0.360       |
| No PIH                                    | 16/654             | 1                            | 1                             |

\* AOR-a: adjusted odds ratios (with 95% confidence intervals, CI) calculated in multiple logistic regression (model-a) after adjusted for primiparity, maternal age, pre-pregnancy BMI, gestational weight gain (GWG) out of the range as well as smoking in the first trimester (p-value < 0.05 was assumed to be significant) (the examined risk factor was excluded from the confounding variables mentioned). Cases: GDM-1 i.e. gestational diabetes mellitus treated with diet (*n* = 125); GDM-2 i.e. gestational diabetes mellitus treated with insulin (*n* = 21); Controls: non-diabetic women (*n* = 766).
