# Supplementary material for: Gestational Diabetes Mellitus (GDM) Risk for Declared Family History of Diabetes, in Combination with BMI Categories
Source: MDPI journal article supplement (doi:10.3390/ijerph18136936), 2021-06-28
Supplement: s1 [file s1]

**Table S2.** Odds ratios of gestational diabetes mellitus (GDM -1, -2) for declared diabetes in grandparents, in the subgroups of pre-pregnancy BMI categories.

| Risk factors /<br>Diabetes in GRANDPARENTS | GDM-1 risk          |                            | GDM-2 risk          |                            |
|--------------------------------------------|---------------------|----------------------------|---------------------|----------------------------|
|                                            | Cases /<br>Controls | AOR-a (95% CI); <i>p</i> * | Cases /<br>Controls | AOR-a (95% CI); <i>p</i> * |
| Whole cohort                               |                     |                            |                     |                            |
| - in the grandfather                       | 5/37                | 1.26 (0.47-3.36); 0.647    | 1/37                | 1.59 (0.18-13.62); 0.674   |
| - in the grandmother                       | 19/70               | 2.48 (1.38-4.47); 0.002    | 3/70                | 1.71 (0.44-6.67); 0.440    |
| Ref. **                                    | 62/559              | 1                          | 11/559              | 1                          |
| Normal BMI                                 |                     |                            |                     |                            |
| - in the grandfather                       | 4/25                | 1.7 (0.55-5.24); 0.358     | 1/25                | 3.41 (0.33-35.14); 0.302   |
| - in the grandmother                       | 11/44               | 2.68 (1.25-5.75); 0.011    | 2/44                | 4.83 (0.83-28.17); 0.080   |
| Ref. **                                    | 39/383              | 1                          | 4/383               | 1                          |
| Underweight                                |                     |                            |                     |                            |
| - in the grandfather                       | 0/2                 | -                          | 0/2                 | -                          |
| - in the grandmother                       | 1/5                 | 0.9 (0.06-14.44); 0.940    | 0/5                 | -                          |
| Ref. **                                    | 5/24                | 1                          | 1/24                | 1                          |
| Overweight                                 |                     |                            |                     |                            |
| - in the grandfather                       | 1/7                 | 4.21 (0.36-49.06); 0.252   | 0/7                 | -                          |
| - in the grandmother                       | 3/9                 | 4.79 (0.73-31.63); 0.104   | 1/9                 | 7.69 (0.37-157.58); 0.186  |
| Ref. **                                    | 9/112               | 1                          | 2/112               | 1                          |
| Obesity                                    |                     |                            |                     |                            |
| - in the grandfather                       | 0/3                 | -                          | 0/3                 | -                          |
| - in the grandmother                       | 4/12                | 1.46 (0.31-6.95); 0.633    | 0/12                | -                          |
| Ref. **                                    | 9/40                | 1                          | 4/40                | 1                          |
| BMI $\geq 25$ kg / m <sup>2</sup>          |                     |                            |                     |                            |
| - in the grandfather                       | 1/10                | 0.82 (0.09-7.13); 0.855    | 0/10                | -                          |
| - in the grandmother                       | 7/21                | 2.96 (1.05-8.32); 0.040    | 1/21                | 1.09 (0.12-9.9); 0.940     |
| Ref. **                                    | 18/152              | 1                          | 6/152               | 1                          |

\* AOR-a: adjusted odds ratios (with 95% confidence intervals, CI) calculated in multiple logistic regression (model-a) after adjusted for multiparity, maternal age, pre-pregnancy BMI, gestational weight gain (GWG) out of the range as well as smoking in the first trimester (*p*- value < 0.05 was assumed to be significant). \*\* Reference category: 'Absence of diabetes in the family'. Cases: GDM-1 i.e. gestational diabetes mellitus treated with diet (*n* = 125); GDM-2 i.e. gestational diabetes mellitus treated with insulin (*n* = 21); Controls: non-diabetic women (*n* = 766).
